1 **A promiscuity locus confers *Lotus burttii* nodulation with rhizobia from five different**  
2 **genera**

3

4 Mohammad Zarrabian<sup>1</sup>, Jesús Montiel<sup>1\*</sup>, Niels Sandal<sup>1</sup>, Haojie Jin<sup>1</sup>, Yen-Yu Lin<sup>2</sup>, Verena  
5 Klingl<sup>2</sup>, Macarena Marín<sup>2</sup>, Euan James<sup>3</sup>, Martin Parniske<sup>2</sup>, Jens Stougaard<sup>1</sup> and Stig U.  
6 Andersen<sup>1\*</sup>

7

8 <sup>1</sup>Department of Molecular Biology and Genetics, Aarhus University, Denmark.

9 <sup>2</sup>Faculty of Biology, University of Munich, Großhaderner Straße 2-4, 82152, Planegg-  
10 Martinsried, Germany

11 <sup>3</sup>The James Hutton Institute, Invergowrie, Dundee DD2 5DA, Scotland UK

12

13 **\*Corresponding authors:**

14 Jesús Montiel ([jesusmg@mbg.au.dk](mailto:jesusmg@mbg.au.dk)) and Stig U. Andersen ([sua@mbg.au.dk](mailto:sua@mbg.au.dk)).

15

16 **Keywords:** symbiotic nitrogen fixation, *Lotus*, host range, genetic mapping, rhizobia

17

18 **Funding:** This work was funded by Danish National Research Foundation grant DNRF79.

19

20

21

## 22 **Abstract**

23 Legumes acquire access to atmospheric nitrogen through nitrogen fixation by rhizobia in root  
24 nodules. Rhizobia are soil dwelling organisms and there is a tremendous diversity of rhizobial  
25 species in different habitats. From the legume perspective, host range is a compromise  
26 between the ability to colonize new habitats, where the preferred symbiotic partner may be  
27 absent, and guarding against infection by suboptimal nitrogen fixers. Here, we investigate  
28 natural variation in rhizobial host range across *Lotus* species. We find that *Lotus burtii* is  
29 considerably more promiscuous than *Lotus japonicus*, represented by the Gifu accession, in  
30 its interactions with rhizobia. This promiscuity allows *Lotus burtii* to form nodules with  
31 *Mesorhizobium*, *Rhizobium*, *Sinorhizobium*, *Bradyrhizobium*, and *Allorhizobium* species that  
32 represent five distinct genera. Using recombinant inbred lines, we have mapped the  
33 Gifu/*burtii* promiscuity QTL to the same genetic locus regardless of rhizobial genus,  
34 suggesting a general genetic mechanism for host-range expansion. The Gifu/*burtii* QTL now  
35 provides an opportunity for genetic and mechanistic understanding of promiscuous legume-  
36 rhizobia interactions.

37

38 **Keywords:** symbiotic nitrogen fixation, *Lotus*, host range, genetic mapping, rhizobia

39

## 40 **Introduction**

41 Symbiosis with nitrogen-fixing rhizobia in root nodules enable legumes to access  
42 atmospheric nitrogen. In most cases, rhizobial entry into root cells requires recognition of  
43 rhizobial Nodulation factors (NF) signalling molecules that are secreted in response to  
44 perception of plant flavonoids (Oldroyd 2013). In turn, host membrane-bound Nod factor  
45 receptors (NFRs) initiate downstream signal transduction pathways initiating rhizobial  
46 infection and nodule organogenesis (Madsen et al. 2003; Radutoiu et al. 2003; Murakami et  
47 al. 2018). Plants produce complex mixtures of flavonoids (Liu and Murray 2016). Likewise,  
48 rhizobia secrete many different Nod factor species (D’Haeze and Holsters 2002), and both  
49 flavonoid and Nod factor pools may change dynamically over time within the same plant

50 accession or rhizobia strain (Liu and Murray 2016; Kelly et al. 2018). This provides an  
51 intricate system that, along with bacterial effectors and exopolysaccharides and the  
52 corresponding plant detection systems, allows fine tuning of legume-rhizobium compatibility  
53 (Yang et al. 2010; Kawaharada et al. 2015; Kusakabe et al. 2020). The successful  
54 establishment of nitrogen fixation requires full compatibility of symbiotic partners.  
55 Symbiotic compatibility can affect early stages of infection, determining whether or not  
56 nodules are formed, or later stages of nodule development, affecting nitrogen-fixing  
57 efficiency or nodule senescence (Perret et al. 2000; Wang et al. 2012; Yang et al. 2017).

58 Intercellular infection is thought to represent a more ancient and less advanced infection  
59 mode than intracellular infection through root hairs (Sprent 2007). Specific legumes are  
60 typically infected either intra- or intercellularly. However, at least some legumes maintain  
61 genetic programs for both types of infection. These include *Sesbania rostrata*, where the  
62 infection mode can change in response to flooding (Herder et al. 2006), and *Lotus* species,  
63 where intercellular infection appears to serve as a backup function to the preferred  
64 intracellular infection route through root hair infection threads. This phenomenon was  
65 observed in *Lotus japonicus* Gifu as rare infection events of spontaneous nodules in a NF  
66 receptor deficient genetic background (Madsen et al. 2010) and has since been found in the  
67 *L. japonicus* Gifu interaction with IRBG74 (Montiel et al. 2020) and in *Lotus burtii*  
68 interactions with *Sinorhizobium fredii* HH103 and *Rhizobium leguminosarum* Norway  
69 (Acosta-Jurado et al. 2016b; Liang et al. 2019). Generally, intracellular root hair infection  
70 appears to offer more stringent scrutiny of the rhizobial partner, whereas the compatibility  
71 requirements for intercellular crack entry appears to be more relaxed (Sprent 2007; Madsen  
72 et al. 2010).

73 In *Lotus*, both inter- and intracellular infection depend on NF signalling (Acosta-Jurado et al.  
74 2016b; Montiel et al. 2020), except in rare cases, if organogenesis is activated in the absence  
75 of Nod factor signalling (Madsen et al. 2010). Candidate gene approaches relying on  
76 interspecific variation in Nod factor receptors has been used to demonstrate their roles in  
77 determining compatibility (Radutoiu et al. 2007). Effectors and secretion system components  
78 that deliver effectors into plant cells also affect compatibility. For instance, the  
79 bradyrhizobial NopP effector is recognised by soybeans carrying the *Rj2* NLR resistance

80 gene, leading to termination of infection (Sugawara et al. 2018), and the *Bradyrhizobium*  
81 *elkanii* NopF effector prevents infection in *Lotus japonicus*, but not in *L. burtii* (Kusakabe  
82 et al. 2020). Rhizobial effectors can also promote symbiotic interactions as exemplified by  
83 the *B. elkanii* effector Bel2-5, which confers the ability to nodulate soybeans deficient in Nod  
84 factor perception (Ratu et al. 2021). Rhizobial genes that affect Nod factor and  
85 exopolysaccharide production can also influence host range as demonstrated by the  
86 *Sinorhizobium fredii* HH1103 *mucR1*, *syrM*, *nolR* and *nodD2* mutants (Acosta-Jurado et al.  
87 2016a). Remarkably, *syrM*, *nolR* and *nodD2* mutations induce a shift from inter- to  
88 intracellular infection in *L. burtii* and extend the host range to include *L. japonicus* Gifu  
89 (Acosta-Jurado et al. 2019, 2020). In addition, *Lotus* intraspecific variation was exploited to  
90 identify *Pxy* as a regulator of symbiotic compatibility downstream of exopolysaccharide  
91 signalling (Kawaharada et al. 2021). Also in *Lotus*, *S. fredii* HH103 is able to form functional  
92 nodules on *L. burtii*, whereas it induced ineffective nodules on *L. japonicus* Gifu, and a QTL  
93 was mapped to chromosome 1 near the *Nfr1* gene (Sandal et al. 2012). Likewise, *L. burtii*  
94 was also more permissive than *L. japonicus* Gifu in the interaction with *R. leguminosarum*  
95 Norway (Grossmann et al. 2012).

96 Here, we investigate natural variation in rhizobial host range between the two *Lotus* species  
97 *L. japonicus* Gifu and *L. burtii*, focusing on host control of symbiotic compatibility.

98

## 99 **Materials and Methods**

100

### 101 **Nodulation phenotyping**

102 For germination, seeds were scarified and surface sterilized with 0.5% sodium hypochlorite  
103 for 15 minutes and rinsed several times with distilled water. Seeds were kept in sterile water  
104 for 1 hour before sowing on wet filter paper. The germinated plants were transferred and  
105 grown on 1/4 Broughton and Dilworth (B&D) medium (Broughton and Dilworth 1971)  
106 where the surface of the agar slope was covered with filter paper. Rhizobia were grown in  
107 yeast agar medium (YAM) except for *R. leguminosarum* strains that were grown in tryptone



108 yeast medium (TY). The strains were diluted to an OD<sub>600</sub> of 0.02 before inoculating with 50  
109 µl per plant by pipetting the suspension directly on the root. The nodulation phenotype was  
110 recorded at 35 days post-inoculation.

111

## 112 **QTL Analysis**

113 We used recombinant *L. japonicus* Gifu x *L. burttii* recombinant inbred lines (RILs) (Sandal  
114 et al. 2012; Shah et al. 2016). For rough mapping, 18 RILs with balanced genotypes were  
115 chosen (**Supplemental dataset 1**). Genotype and phenotype data were imported into R/qtI  
116 version 3.4.2 (R Project for Statistical Computing, [www.r-project.org/](http://www.r-project.org/)) using the read.cross  
117 command. After converting to RIL format, the genetic map and missing genotype values  
118 were estimated using est.map and mqmaugment, respectively. Multiple QTL Mapping  
119 (MQM) was then conducted using 1000 permutations to determine significance thresholds.

120

## 121 **Hairy root transformation with *Nfr1* constructs**

122 The *L. burttii* *Nfr1* (BinG1) construct was based on the *L. japonicus* *Nfr1* complementation  
123 construct, (carrying the entire *LjNfr1* gene driven by its own promoter), which was modified  
124 using standard cloning techniques and transferred into the pIV10 integration vector  
125 (AM235368). The construct was integrated into the *Agrobacterium rhizogenes* strain AR12  
126 (Hansen et al. 1989). BinG1 was constructed as follows: a DNA fragment from position 4090  
127 to position 4993 of the *Nfr1* gene (AJ575246/AJ575247) was substituted by the  
128 corresponding fragment from *L. burttii* produced by PCR. The two *L. japonicus* Gifu/*L.*  
129 *burttii* polymorphisms identified in the *Nfr1* extracellular region are both contained within  
130 the *L. burttii* fragment included in the *BinG1* construct.

131

## 132 **Genotyping and phenotyping of F1 progeny of *L. burttii* and *L. japonicus* crosses**

133 Crosses using *L. burttii* as mother and *L. japonicus* Gifu as father, or the converse, were  
134 generated. Seeds of *L. burttii* B-303, *L. japonicus* Gifu B-129 and the F1 progeny were  
135 scarified and surface-sterilized as described earlier. Six-day old seedlings were transferred  
136 into tulip shaped Weck jars (Weck 745) containing 300 ml sterilized sand-vermiculite  
137 mixture supplemented with 40 ml of FAB medium. After two days, each plant was inoculated  
138 with 1 ml of a *R. leguminosarum* Norway suspension ( $OD_{600} = 0.005$ ) or 1 ml FAB medium  
139 as a mock control. Plants were grown under a long-day photoperiod for six weeks and  
140 phenotyped using a MZ16 FA stereomicroscope (Leica). For genotyping, genomic DNA was  
141 extracted from leaves lysed in liquid nitrogen. Lysates were suspended in 500  $\mu$ l extraction  
142 buffer (2% w/v CTAB, 1.42 M NaCl, 20 mM EDTA, 100 mM Tris-HCl, pH8) supplemented  
143 with 3.1  $\mu$ l beta-mercaptoethanol and incubated at 65 °C for 20 min. Suspensions were mixed  
144 with 300  $\mu$ l chloroform and centrifuged at 14,000 rpm for 5 min. Supernatants were mixed  
145 with 1/10 volume of 3 M NaOAc and centrifuged at 14,000 rpm for 15 min. Pellets were  
146 washed two times with 70% ethanol, air-dried and re-suspend in 50  $\mu$ l distilled water. The  
147 DNA was used as template in PCR reactions with the *Lotus* marker TM1203 (forward:  
148 TTGAATAAGGCTCATAGATCC, reverse: CTCAGTTTGGGTTTCAAGC) (Sato et al.,  
149 2001) and verified by agarose gel electrophoresis.

150

## 151 **Results**

152

### 153 ***L. burttii* nodulates with rhizobia from five different genera**

154 It was previously reported that *S. fredii* HH103 forms functional nodules on *L. burttii* but not  
155 on *L. japonicus* Gifu (Sandal et al. 2012). In order to determine if *L. burttii* is generally more  
156 permissive in its symbiotic interactions than Gifu, we examined the nodulation phenotypes  
157 of Gifu and *L. burttii* with a wide range of rhizobia from different genera including  
158 *Sinorhizobium*, *Azorhizobium*, *Bradyrhizobium*, *Rhizobium*, *Allorhizobium* and  
159 *Mesorhizobium* (**Figure 1**). These distantly related rhizobial species produce NF with  
160 different chemical modifications at the nonreducing and reducing ends (D’Haeze and

161 Holsters 2002; Beck et al. 2010; Renier et al. 2011) (**Table 1**; ). We observed large variation  
162 in nodule numbers and structures, which included nodule primordia “bumps”, white nodules  
163 and in some cases small or more developed pink nodules, indicative of nitrogen fixation  
164 (**Figure 2 A-D**). Among the 42 strains tested, only the cognate *Lotus* symbiont *M. loti* R7A  
165 induced development of pink nodules in both Gifu and *L. burtii* (**Figure 2A and D**). At the  
166 other extreme, *Sinorhizobium meliloti* nodulated neither. *Sinorhizobium fredii* NGR234,  
167 which is compatible with a very broad range of legumes (Pueppke 1999), was unique in  
168 promoting a larger number of pink nodules in Gifu than in *L. burtii* (**Figure 2D**;  
169 **Supplementary Figure S1**). None of the remaining 39 strains formed pink nodules with  
170 Gifu. In contrast, 30 out of the 39 strains formed at least some pink nodules with *L. burtii*  
171 (**Figure 2A and D**). The 30 strains that nodulate *L. burtii* comprise five of the genera tested,  
172 indicating that the host range of *L. burtii* is broad and that *L. burtii* is considerably more  
173 promiscuous in its symbiotic interactions than Gifu, regardless the diverse composition of  
174 the NF produced by the rhizobial strains (**Table 1**).

175

#### 176 ***L. burtii* allows nodulation with inefficient nitrogen fixers**

177 Efficient nitrogen fixation by rhizobia in fully developed nodules has a positive impact on  
178 the plant host, reflected in a more vigorous growth of the aerial part (Lindstrom and Mousavi,  
179 2019). Accordingly, both Gifu and *L. burtii* plants nodulated by *M. loti* R7A showed a  
180 significantly greater shoot length compared to mock-treated plants (**Figure 2A and E**). None  
181 of the 41 remaining Gifu-rhizobial associations had a positive impact on shoot length. In  
182 contrast, *L. burtii* growth was significantly enhanced by 10 different rhizobial species, nine  
183 of which developed pink nodules. However, *R. leguminosarum* strain USDA2356 (strain  
184 #33), which did not induce any pink nodules, resulted in significantly longer shoot lengths  
185 than the mock control (**Figure 2A and E**), suggesting a growth promoting effect independent  
186 of nitrogen fixation.

187 Despite formation of pink nodules, seventeen *L. burtii*-rhizobia interactions resulted in  
188 plants displaying similar shoot length to mock-treated plants, whereas a significant reduction  
189 of plant growth was observed in plants nodulated by nine rhizobial species (**Figure 2A and**

190 E). These results show that although a wide range of rhizobial species developed pink  
191 nodules with *L. burttii*, most of them did not have a positive impact on growth and instead  
192 resulted in neutral or negative outcomes. This finding prompted us to further analyse the  
193 correlation between rhizobial colonization and plant growth. We used a subset of 11 *L.*  
194 *burttii*-rhizobia combinations, which included strains from the five different genera that  
195 formed pink nodules with *L. burttii*. For each of the 11 different *L. burttii*-rhizobia  
196 associations, only the shoot length of plants with fully developed pink nodules was compared  
197 to mock-treated plants and to plants nodulated by *M. loti* R7A (**Figure 3A**). Additionally, the  
198 nodule structure and bacteroid occupancy in the nodule cells were visualized by light  
199 microscopy (**Figure 3B-M**). Only *L. burttii* plants harbouring pink nodules colonized by *S.*  
200 *americanus* and *A. undicola* (strains #7 and #35) showed comparable shoot growth to plants  
201 nodulated by *M. loti* R7A (**Figure 3A**). In contrast, plants nodulated by *Bradyrhizobium* Sp.  
202 ORS285 (strain #38) exhibited a significant reduction in the shoot length, while the  
203 remaining *L. burttii*-rhizobia interactions did not affect the length of the aerial part (**Figure**  
204 **3A**). Nodule sections revealed successful rhizobial colonization by all 11 strains tested,  
205 though to different extents. *L. burttii* nodules were heavily colonized by *R. leguminosarum*  
206 SM140B, *R. leguminosarum* SM144A and *Bradyrhizobium* ORS285 (**Figure 3G, H and L**),  
207 but none of these strains had a positive effect on plant shoot length (**Figure 3A**). These results  
208 confirm that the permissive nature of *L. burttii*, which allows successful nodulation by a  
209 broad range of rhizobial species, does not always result in growth promotion.

210

### 211 A single genetic locus near *Nfr1* confers *L. burttii* promiscuity

212 With the exception of *S. fredii* NGR234, Gifu only formed large, pink nodules with its  
213 cognate efficient nitrogen fixer *M. loti* that contributed positively to plant growth. The  
214 situation was much more complex for *L. burttii*, which engaged in many more different  
215 interactions with variable outcomes for the plant. In order to understand the genetics  
216 underlying *L. burttii* promiscuity, we inoculated 18 Gifu x *L. burttii* RILs (Sandal et al., 2012)  
217 with the 11 diverse strains mentioned above and *R. leguminosarum* Norway, which nodulates  
218 *L. burttii* roots intercellularly but does not form nodules with Gifu (Grossmann et al. 2012;  
219 Liang et al. 2019) (**Figure 3; Supplementary dataset 1**).

220 We scored the average number of pink nodules for each RIL-rhizobium combination  
221 (**Supplemental dataset 1**) and analysed the resulting data using R/qtl. TM0002, the marker  
222 previously reported to be associated with the *S. fredii* HH103 Gifu/*L. burttii* QTL (Sandal et  
223 al. 2012), was identified as the highest peak in the QTL analyses for all 12 strains (**Figure**  
224 **4**). Interestingly, the single locus that appears to be responsible for allowing *L. burttii*  
225 nodulation with all 12 strains tested was located on chromosome 1, near the Nod Factor  
226 Receptor gene *Nfr1*.

227

### 228 **A *L. burttii*/Gifu *Nfr1* domain swap construct complements the *nfr1* mutant in a Gifu** 229 **background, but does not extend its host range**

230 Our analysis revealed that an *Nfr1*-linked locus, or *Nfr1* itself, is involved in determining  
231 permissiveness towards diverse rhizobial species in *L. burttii*. We sequenced the extracellular  
232 region of the *L. burttii Nfr1* gene and found two mis-sense substitutions compared to the Gifu  
233 gene (T124A and Y213D, Gifu/*L. burttii*). This made *Nfr1* a strong candidate gene for  
234 explaining the capacity of *L. burttii* to establish symbiotic associations with multiple  
235 rhizobial genera. To examine this possibility, we created a BinG1 domain swap construct  
236 where the *Nfr1* extracellular domain from Gifu was replaced by the corresponding fragment  
237 from *L. burttii Nfr1*. This construct was introduced into Gifu wild type and *Ljnfr1-1* mutant  
238 backgrounds using *Agrobacterium rhizogenes* hairy root transformation. The *BinG1*  
239 construct was functional and rescued Gifu *nfr1-1* nodulation with *M. loti* R7A (**Figure 5**). In  
240 contrast, it did not enable either the Gifu wild type or the Gifu *nfr1-1* mutant to nodulate with  
241 *S. fredii* HH103 (**Figure 5**). A functional *L. burttii Nfr1* extracellular domain in the Gifu  
242 background was thus not sufficient for extending the rhizobial host range of Gifu.

243

### 244 **Nodulation of *L. burttii* with *R. leguminosarum* Norway is a dominant trait**

245 Recently it was shown that *Rhizobium leguminosarum* Norway colonizes *L. burttii* roots  
246 intercellularly (Liang et al. 2019) but is unable to infect *L. japonicus* (Grossman et al. 2012).  
247 This report along with the data presented in this study confirms the wide host range of *L.*

248 *burtii* with diverse rhizobial species. To assess if this nodulation promiscuity is a recessive  
249 or dominant trait, the F1 progeny of crosses between *L. burtii* and *L. japonicus* Gifu were  
250 inoculated with *R. leguminosarum* Norway-GFP. Gifu remained without nodules six weeks  
251 post inoculation. The F1 progeny developed nodules regardless of the parental combination  
252 (**Figure 6A**) and all phenotyped F1 plants were heterozygous (**Figure 6B**). These results  
253 show that the nodulation phenotype of *L. burtii* is dominant.

254

## 255 **Discussion**

256 The legume-rhizobia symbiosis is an illustrative example of a highly specific and stringent  
257 molecular dialogue between symbiotic partners. Despite this fact, it is known that certain  
258 rhizobial species such as *S. fredii* NGR234 is able to establish symbiotic associations with  
259 diverse legumes from distant phylogenetic genera (Pueppke and Broughton, 1999). In the  
260 last decades, both rhizobial and plant components defining the legume-rhizobia compatibility  
261 have been identified (Walker et al. 2020). This study shows that a single locus in *L. burtii* is  
262 responsible for promiscuous interactions across rhizobial genera.

263

## 264 ***L. burtii* a promiscuous symbiotic partner engaged in beneficial and detrimental** 265 **associations**

266 *L. burtii* is related to *L. japonicus*, a model legume with extensive genetic and transcriptomic  
267 resources (Fukai et al. 2012; Urbański et al. 2012; Mun et al. 2016; Małolepszy et al. 2016;  
268 Kamal et al. 2020). Unlike *L. japonicus*, which seems to be nodulated by a narrow range of  
269 rhizobial partners, *L. burtii* established 30 associations with diverse rhizobia that culminated  
270 in the formation of pink nodules. Excluding the *L. burtii*-*M. loti* interaction, only nine  
271 rhizobial species had a marginal but significantly positive contribution to host plant growth  
272 while the rest of the rhizobial interactions either did not affect or had a negative impact on *L.*  
273 *burtii* growth. Except for *R. leguminosarum* Norway (Liang et al. 2018), the rhizobial strains  
274 used in this study are efficient nitrogen fixers in the symbiotic associations with their cognate  
275 plant hosts (Cavassim et al. 2020; Moeskjær et al. 2021; Pueppke and Broughton 1999;

276 Dreyfus and Dommergues 1981; Buendia-Claveria et al. 1989; Lajudie et al. 1994; Mora et  
277 al. 2014; Lajudie et al. 1998a, 1998b; Gao et al. 2004; Ramírez-Bahena et al. 2009; Gao et  
278 al. 2015). The suboptimal outcomes of many of these *L. burttii*-rhizobial associations may  
279 be caused by a delay in the nodulation kinetics, as occurs in the *L. burttii*-*S. fredii* HH103  
280 symbiosis (Acosta-Jurado et al. 2016b). However, additional compatibility elements, acting  
281 at later stages of nodulation could be required for efficient nodule functioning and nitrogen  
282 fixation (Walker et al. 2020). Similar examples of inefficient legume-rhizobia symbioses  
283 have been documented in *Medicago* spp. *S. meliloti* 1021 is an efficient nitrogen-fixer in  
284 *Medicago sativa* nodules and is also able to form pink nodules with the *M. truncatula*  
285 accessions A17 and R108, but with poor nitrogen fixation performance (Terpolilli et al. 2008;  
286 Kazmierczak et al. 2017). Similarly, ineffective mutants of *S. meliloti* were comparable to  
287 their effective counterparts in colonizing *M. sativa* nodules (Amarger 1981). However,  
288 legumes possess mechanisms to reward or penalize the effectiveness of their rhizobial  
289 partners hosted within nodule cells. In soybean nodules, where inefficient nitrogen fixation  
290 was mimicked by substituting nitrogen for argon, the population and growth of rhizobia was  
291 drastically lower with respect to nodules where nitrogen fixation was performed efficiently  
292 (Kiers et al. 2003). Likewise, four-generation experiments conducted with twelve *M.*  
293 *truncatula* genotypes inoculated with a mixture of three rhizobial strains from their native  
294 range revealed an increase in the relative frequency of more beneficial rhizobial strains,  
295 estimated by the nodule number and size (Heath and Tiffin 2009).

296 A relatively low capacity of legumes to colonize new habitats seems to be related to a scarce  
297 presence of compatible symbionts (Parker 2001). This idea is supported by the high  
298 invasiveness of certain woody legumes that possess a broad compatibility with diverse  
299 rhizobial strains (Richardson et al. 2000). A comparative study among congeneric acacias  
300 revealed that those considered invasive associate with a significantly greater number of  
301 rhizobial strains than the natural and non-invasive acacias in Australia (Klock et al. 2015).  
302 However, studies conducted in distinct geographical regions show that differential  
303 invasiveness of *Acacia* species is not always determined by a broad promiscuity with  
304 rhizobial strains (Klock et al. 2016; Keet et al. 2017). Similar approaches could be taken with  
305 *L. burttii* to further understand the contribution of host range to legume adaptiveness.



306

307



## 308 **Molecular players restricting the compatibility of legume-rhizobium associations**

309 Root nodule symbiosis encompasses different checkpoints where suitable symbionts are  
310 scrutinized, from the early infection to development of functional, nitrogen fixing nodules  
311 (Walker et al. 2020). The rhizobial host range is determined by the perception of specific root  
312 flavonoids along with certain rhizobial effectors and genes that contribute to NF and  
313 exopolysaccharide production (Sugawara et al. 2018; Acosta-Jurado et al. 2016a; Acosta-  
314 Jurado et al. 2019, 2020; Kusakabe et al. 2020; Ratu et al. 2021). From the plant side, the  
315 first step in symbiotic partner discrimination is the recognition of specific NFs by NF  
316 receptors (Radutoiu et al. 2003; Amor et al. 2003; Smit et al. 2007). The next level of  
317 selectivity is imposed by scrutiny of exopolysaccharides (EPS) produced by rhizobia. In Lotus,  
318 this relies on the EPS receptor *LjEpr3* (Kawaharada et al. 2015) and EPS signalling appears  
319 to be of general importance across legumes. The incompatibility of *S. meliloti* Rm41 with *M.*  
320 *truncatula* A17 is abolished by incorporating the succinoglycan-coding *exo* gene of the  
321 compatible *S. meliloti* 1021 (Simsek et al. 2007). Similarly, EPS composition confers  
322 different levels of rhizobial resistance towards the antimicrobial *M. truncatula* nodule-  
323 specific cysteine-rich peptides (NCRs) produced in the nodule cells of certain legumes to  
324 impose terminal differentiation of bacteroids (Montiel et al. 2017; Arnold et al. 2018). In this  
325 regard, the presence of a functional NCR allele in the *M. truncatula* A17 accession restricts  
326 its symbiotic association with *S. meliloti* Rm41. This incompatibility is not present in the *M.*  
327 *truncatula* DZA315 accession that possesses a non-functional NCR allele (Yang et al. 2017;  
328 Wang et al. 2017).

329 The broad host range in *L. burttii* is not explained by any of the plant regulators mentioned  
330 above. Unlike legumes of the inverted repeat-lacking clade, where terminal differentiation of  
331 bacteroids is orchestrated by NCRs, this peptide family is absent in *Lotus* spp. (Kereszt et al.  
332 2018). Our QTL analyses with data generated from 18 Gifu x *L. burttii* RILs inoculated with  
333 12 diverse rhizobial strains showed that a locus near microsatellite marker TM0002 confers  
334 the symbiotic promiscuity of *L. burttii*. It is unlikely that *LjEpr3* is responsible for the  
335 extended nodulation capacity of *L. burttii*, since this gene is not located near TM0002. By  
336 contrast, the NF receptor gene *NfrI* was an obvious candidate, since it is located near the  
337 TM0002 locus. However, Gifu plants expressing a functional extracellular domain of *L.*

338 *burttii* *Nfr1* did not result in host-range expansion to include nodulation with *S. fredii* HH103.  
339 Since *Nfr1* expression was driven by the Gifu *Nfr1* promoter in this experiment and since  
340 there may be additional Gifu/*L. burttii* polymorphisms in other *Nfr1* domains, differences in  
341 gene sequence or in endogenous *Nfr1* expression levels between *L. burttii* and Gifu may still  
342 account for the difference in nodulation phenotype. However, the *L. burttii* symbiotic  
343 associations are established with rhizobial strains producing NF with very diverse  
344 decorations (**Table 1**) (D’Haeze and Holsters 2002; Bek et al. 2010; Renier et al. 2011),  
345 suggesting that minor changes to nod factor receptors may not be the most likely cause of *L.*  
346 *burttii* promiscuity. An alternative explanation is that other components linked to the  
347 TM0002 marker are responsible, for instance, the presence of several resistance proteins in  
348 *G. max* restrict strain specific interactions with rhizobia (Walker et al. 2020). Likewise in  
349 *Lotus* accessions it was recently found that *Bradyrhizobium elkanii* USDA61 mutants  
350 disrupted in different effector proteins of the type III secretion system are affected at different  
351 checkpoints in their symbiotic association with *L. burttii*, *L. japonicus* Gifu and *L. japonicus*  
352 MG-20 (Kusakabe et al. 2020). However, the broad host ability of *L. burttii* is unlikely to be  
353 linked to a missing R-gene, since the F1 progeny of *L. burttii* and Gifu crosses retained the  
354 nodulation capacity with *R. leguminosarum* Norway, while Gifu wile type plants were unable  
355 to develop nodules. Therefore, the genetic components responsible for the pronounced  
356 symbiotic promiscuity of *L. burttii* remain elusive.

357

## 358 **Conclusion**

359 In this study we have shown that *L. burttii* exhibits a remarkably broad host range, which is  
360 controlled by a single, dominant genetic locus near the TM0002 marker.

361

## 362 **Author contributions**

363 M.Z., N.S., H.J., Y.-Y.L., E.J. performed experiments. J.S., S.U.A., M.P., M.M. provided  
364 resources. M.Z., and J.M. analysed data. S.U.A. supervised the project. M.Z., J.M. and  
365 S.U.A. wrote the paper.

366

## 367 Acknowledgements

368 This work was funded by Danish National Research Foundation grant DNRF79.

369

## 370 Figure legends

371 **Figure 1. Phylogenetic distribution of rhizobia used in this study.** Phylogenetic tree of  
372 Alpha and Beta-rhizobia adapted from Sprent et al. (2017) to highlight the number of species  
373 used in this work from each rhizobial genus to evaluate the nodulation capacity of *L.*  
374 *japonicus* Gifu and *Lotus burttii*.

375 **Figure 2. Nodulation and shoot phenotypes.** A, Presence (filled rectangles) or absence  
376 (unfilled rectangles) of bumps (B), white nodules (W), and pink nodules (P) in Gifu and *L.*  
377 *burttii* plants at 5 wpi with 42 different rhizobial strains. In column S, the black and red  
378 arrows indicate a significant increase or decrease of the shoot length respect to mock-treated  
379 plants, respectively. Student's t test;  $P < 0.01$ . B-E, Violin dot plots showing the number of  
380 bumps, white nodules, pink nodules and shoot length in Gifu and *L. burttii* harvested at 5 wpi  
381 with the rhizobial indicated in 2A. Dashed lines in green and orange highlight the average  
382 shoot length in mock-treated plants of Gifu and *L. burttii*, respectively.

383 **Figure 3. Shoot length and nodule histology of *L. burttii* plants.** A, Violin dot plots  
384 showing the shoot length of *L. burttii* plants with pink nodules at 5 wpi with rhizobial species  
385 from different genera. Letters a and c, below the violin plots, indicate non-significant  
386 differences between the shoot length compared to mock-treated or R7A-inoculated plants,  
387 respectively; b, means significant difference to mock-treated and R7A-inoculated plants.  
388 ANOVA, P-Tukey  $< 0.01$ . The colour code reflects the phylogenetic proximity of the species  
389 shown in Figure 1. Dashed grey line highlights the average shoot length in mock-treated  
390 plants. B-M, Nodule histology with representative images of pink nodules developed in *L.*  
391 *burttii* by different rhizobial strains. Scale bar, 1 mm for nodules and 100  $\mu\text{m}$  nodule sections.

392 **Figure 4. QTL analysis of Gifu x *L. burttii* RIL nodulation.** The trait analysed is the  
393 average number of pink nodules. A: *S. fredii* HH103. B: *S. fredii* USDA257. C: *S. americanus*  
394 CFEI156. D: *R. leguminosarum* SM155B. E: *R. leguminosarum* SM140B. F: *R.*  
395 *leguminosarum* SM144A. G: *R. leguminosarum* vici. H: *A. undicola* LMGT. I: *M.*  
396 *plurifarum* PMS0804. J: *Bradyrhizobium* sp. ORS285. K: *B. pachyrhizi* PMS0802. L: *R.*  
397 *leguminosarum* Norway.

398 **Figure 5. Influence of the *Nfr1* genotype on nodulation with *S. fredii* HH103.** Violin dot  
399 plots show the number of pink nodules found in *L. burttii*, Gifu and the *LjNfr1-1* mutant  
400 transformed with the *BinG1* and *LjNfr1* constructs or the empty vector at 5 wpi with *M. loti*  
401 R7A and *S. fredii* HH103. *BinG1*, *Nfr1* extracellular domain of Gifu replaced by the

402 corresponding fragment from *L. burttii* *Nfr1* expressed under *LjNfr1* promoter. *LjNfr1*, Gifu  
403 *Nfr1* sequence expressed under its native promoter. The number of plants tested is indicated  
404 below the violin plots.

405 **Figure 6. *L. burttii* x *L. japonicus* Gifu F1 genotype and nodulation phenotype with *R.***  
406 ***leguminosarum* Norway.** A, Violin dot plots show the nodule numbers at 6 wpi with *R.*  
407 *leguminosarum* Norway in *L. burttii*, *L. japonicus* Gifu and the F1 progeny from crosses  
408 between these two genotypes. The number of plants tested are described below the violin dot  
409 plots. B, Agarose gel with PCR products amplified with a set of primers for the *Lotus* power  
410 marker TM1203 using as template DNA isolated from *L. burttii* (Lb), *L. japonicus* Gifu (Lj  
411 Gifu) and the F1 progeny from their crosses (Lb x Lj Gifu).

412 **Supplementary Figure S1. Contrasting nodulation phenotypes in Gifu and *L. burttii***  
413 **with different rhizobial species.** Representative images of nodule structures developed in  
414 Gifu and *L. burttii* plants at 5 wpi with *S. fredii* NGR234 (A), *S. teranga* LMG7834 (B), *R.*  
415 *leguminosarum* SM20 (C), *R. leguminosarum* SM5 (D), *M. plurifarium* PMS0804 (E) and *B.*  
416 *pachyrhizi* PMS0802 (F). Scale bar, 1 mm.

417 **Table 1. NF structure in rhizobial strains from different genera.** Composition and  
418 chemical decorations in the nonreducing and reducing end of NF produced by rhizobial  
419 species used in this study (\*) and closely related strains. Table adapted from D’Haeze and  
420 Holsters (2002). Abbreviations: Ac, acetyl; Ara, arabinosyl; Cb, carbamoyl; Fuc, fucosyl;  
421 Me, methyl; S, sulfate ester; H, hydroxide. The colour code reflects the phylogenetic  
422 proximity of the species shown in Figure 1.

423

## 424 References

425

426

427 Acosta-Jurado, S., Alias-Villegas, C., Navarro-Gómez, P., Almozara, A., Rodríguez-  
428 Carvajal, M. A., Medina, C., and Vinardell, J. 2020. Sinorhizobium fredii HH103 syrM  
429 inactivation affects the expression of a large number of genes, impairs nodulation with  
430 soybean and extends the host-range to Lotus japonicus. Environ Microbiol. 22:1104–  
431 1124

432 Acosta-Jurado, S., Alias-Villegas, C., Navarro-Gómez, P., Zehner, S., Murdoch, P. del S.,  
433 Rodríguez-Carvajal, M. A., Soto, M. J., Ollero, F.-J., Ruiz-Sainz, J. E., Göttfert, M., and  
434 Vinardell, J.-M. 2016a. The Sinorhizobium fredii HH103 MucR1 Global Regulator Is  
435 Connected With the nod Regulon and Is Required for Efficient Symbiosis With Lotus  
436 burttii and Glycine max cv. Williams. Mol Plant-microbe Interactions. 29:700–712

437 Acosta-Jurado, S., Rodríguez-Navarro, D., Kawaharada, Y., Rodríguez-Carvajal, M. A.,  
438 Gil-Serrano, A., Soria-Díaz, M. E., Pérez-Montaño, F., Fernández-Perea, J., Niu, Y.,  
439 Alias-Villegas, C., Jiménez-Guerrero, I., Navarro-Gómez, P., López-Baena, F. J., Kelly,  
440 S., Sandal, N., Stougaard, J., Ruiz-Sainz, J. E., and Vinardell, J. 2019. Sinorhizobium

- 441        *fredii* HH103 *noIR* and *nodD2* mutants gain capacity for infection thread invasion of  
442        *Lotus japonicus* Gifu and *Lotus burtii*. *Environ Microbiol.* 21:1718–1739
- 443        Acosta-Jurado, S., Rodríguez-Navarro, D.-N., Kawaharada, Y., Perea, J. F., Gil-Serrano,  
444        A., Jin, H., An, Q., Rodríguez-Carvajal, M. A., Andersen, S. U., Sandal, N., Stougaard,  
445        J., Vinardell, J.-M., and Ruiz-Sainz, J. E. 2016b. *Sinorhizobium fredii* HH103 Invades  
446        *Lotus burtii* by Crack Entry in a Nod Factor-and Surface Polysaccharide-Dependent  
447        Manner. *Molecular plant-microbe interactions : MPMI.* 29:925–937
- 448        Amarger, N. 1981. Competition for nodule formation between effective and ineffective  
449        strains of *Rhizobium meliloti*. *Soil Biology Biochem.* 13:475–480
- 450        Amor, B. B., Shaw, S. L., Oldroyd, G. E. D., Maillet, F., Penmetsa, R. V., Cook, D., Long,  
451        S. R., Dénarié, J., and Gough, C. 2003. The NFP locus of *Medicago truncatula* controls  
452        an early step of Nod factor signal transduction upstream of a rapid calcium flux and root  
453        hair deformation. *Plant J.* 34:495–506
- 454        Arnold, M. F. F., Penterman, J., Shabab, M., Chen, E. J., and Walker, G. C. 2018.  
455        Important Late-Stage Symbiotic Role of the *Sinorhizobium meliloti* Exopolysaccharide  
456        Succinoglycan. *J Bacteriol.* 200:e00665-17
- 457        Bek, A. S., Saure, J., Thygesen, M. B, Duus, J. O., Petersen, B. O., Thirup, S., James, E.,  
458        Jensen, K. J., Stougaard, J., and Radutoiu, S. 2010. Improved Characterization of Nod  
459        Factors and Genetically Based Variation in LysM Receptor Domains Identify Amino  
460        Acids Expendable for Nod Factor Recognition in *Lotus* spp. *Mol Plant Microbe Interact*  
461        23: 58–66
- 462        Broughton, W. J., and Dilworth, M. J. 1971. Control of leghaemoglobin synthesis in snake  
463        beans. *Biochem J.* 125:1075–1080
- 464        Buendia-Claveria, A. M., Chamber, M., and Ruiz-Sainz, J. E. 1989. A Comparative Study  
465        of the Physiological Characteristics, Plasmid Content and Symbiotic Properties of  
466        Different *Rhizobium fredii* Strains. *Syst Appl Microbiol.* 12:203–209
- 467        Cavassim, M. I. A., Moeskjær, S., Moslemi, C., Fields, B., Bachmann, A., Vilhjálmsson, B.  
468        J., Schierup, M. H., Young, J. P. W., and Andersen, S. U. 2020. Symbiosis genes show a  
469        unique pattern of introgression and selection within a *Rhizobium leguminosarum*  
470        species complex. *Microbial genomics.* :89
- 471        D’Haeze, W., and Holsters, M. 2002. Nod factor structures, responses, and perception  
472        during initiation of nodule development. *Glycobiology.* 12:79R-105R
- 473        Dreyfus, B. L., and Dommergues, Y. R. 1981. Nitrogen-fixing nodules induced by  
474        *Rhizobium* on the stem of the tropical legume *Sesbania rostrata*. *Fems Microbiol Lett.*  
475        10:313–317

- 476 Fukai, E., Soyano, T., Umehara, Y., Nakayama, S., Hirakawa, H., Tabata, S., Sato, S., and  
477 Hayashi, M. 2012. Establishment of a *Lotus japonicus* gene tagging population using the  
478 exon-targeting endogenous retrotransposon LORE1. *The Plant journal : for cell and*  
479 *molecular biology*. 69:720–730
- 480 Gao, J.-L., Turner, S. L., Kan, F. L., Wang, E. T., Tan, Z. Y., Qiu, Y. H., Gu, J.,  
481 Terefework, Z., Young, J. P. W., Lindström, K., and Chen, W. X. 2004. *Mesorhizobium*  
482 *septentrionale* sp. nov. and *Mesorhizobium temperatum* sp. nov., isolated from  
483 *Astragalus adsurgens* growing in the northern regions of China. *Int J Syst Evol Micr.*  
484 54:2003–2012
- 485 Gao, T. G., Xu, Y. Y., Jiang, F., Li, B. Z., Yang, J. S., Wang, E. T., and Yuan, H. L. 2015.  
486 Nodulation Characterization and Proteomic Profiling of *Bradyrhizobium liaoningense*  
487 CCBAU05525 in Response to Water-Soluble Humic Materials. *Sci Rep-uk*. 5:10836
- 488 Gossmann, J. A., Markmann, K., Brachmann, A., Rose, L. E., Parniske, M. 2012.  
489 Polymorphic infection and organogenesis patterns induced by a *Rhizobium*  
490 *leguminosarum* isolate from *Lotus* root nodules are determined by the host genotype.  
491 *New Phytol*. 196:561-573
- 492 Hansen, J., Jorgensen, J. E., Stougaard, J., and Marcker, K. A. 1989. Hairy roots – a short  
493 cut to transgenic root nodules. *Plant Cell Rep*. 8:12-15
- 494 Heath, K. D., and Tiffin, P. 2009. Stabilizing mechanisms in a legume–rhizobium  
495 mutualism. *Evolution*. 63:652–662
- 496 Herder, G. D., Schroeyers, K., Holsters, M., and Goormachtig, S. 2006. Signaling and Gene  
497 Expression for Water-Tolerant Legume Nodulation. *Crit Rev Plant Sci*. 25:367–380
- 498 Kamal, N., Mun, T., Reid, D., Lin, J.-S., Akyol, T. Y., Sandal, N., Asp, T., Hirakawa, H.,  
499 Stougaard, J., Mayer, K. F. X., Sato, S., and Andersen, S. U. 2020. Insights into the  
500 evolution of symbiosis gene copy number and distribution from a chromosome-scale  
501 *Lotus japonicus* Gifu genome sequence. *DNA research : an international journal for*  
502 *rapid publication of reports on genes and genomes*.
- 503 Kawaharada, Y., Kelly, S., Nielsen, M. W., Hjuler, C. T., Gysel, K., Muszyński, A.,  
504 Carlson, R. W., Thygesen, M. B., Sandal, N., Asmussen, M. H., Vinther, M., Andersen,  
505 S. U., Krusell, L., Thirup, S., Jensen, K. J., Ronson, C. W., Blaise, M., Radutoiu, S., and  
506 Stougaard, J. 2015. Receptor-mediated exopolysaccharide perception controls bacterial  
507 infection. *Nature*. 523:308–312
- 508 Kawaharada, Y., Sandal, N., Gupta, V., Jin, H., Kawaharada, M., Taniuchi, M., Ruman, H.,  
509 Nadzieja, M., Andersen, K. R., Schneeberger, K., Stougaard, J., and Andersen, S. U.  
510 2021. Natural variation identifies a Pxy gene controlling vascular organisation and  
511 formation of nodules and lateral roots in *Lotus japonicus*. *New Phytol*. 230:2459–2473



- 512 Kazmierczak, T., Nagymihály, M., Lamouche, F., Barrière, Q., Guefrachi, I., Alunni, B.,  
513 Ouadghiri, M., Ibijbijen, J., Kondorosi, É., Mergaert, P., and Gruber, V. 2017. Specific  
514 Host-Responsive Associations Between *Medicago truncatula* Accessions and  
515 *Sinorhizobium* Strains. *Mol Plant-microbe Interactions*. 30:399–409
- 516 Keet, J.-H., Ellis, A. G., Hui, C., and Roux, J. J. L. 2017. Legume–rhizobium symbiotic  
517 promiscuity and effectiveness do not affect plant invasiveness. *Ann Bot-london*.  
518 119:1319–1331
- 519 Kelly, S., Sullivan, J. T., Kawaharada, Y., Radutoiu, S., Ronson, C. W., and Stougaard, J.  
520 2018. Regulation of Nod factor biosynthesis by alternative NodD proteins at distinct  
521 stages of symbiosis provides additional compatibility scrutiny. *Environmental*  
522 *microbiology*. 20:97–110
- 523 Kereszt, A., Mergaert, P., Montiel, J., Endre, G., and Kondorosi, É. 2018. Impact of Plant  
524 Peptides on Symbiotic Nodule Development and Functioning. *Frontiers in plant science*.  
525 9:1026
- 526 Kiers, E. T., Rousseau, R. A., West, S. A., and Denison, R. F. 2003. Host sanctions and the  
527 legume–rhizobium mutualism. *Nature*. 425:78–81
- 528 Klock, M. M., Barrett, L. G., Thrall, P. H., and Harms, K. E. 2016. Differential plant  
529 invasiveness is not always driven by host promiscuity with bacterial symbionts. *Aob*  
530 *Plants*. 8:plw060
- 531 Klock, M. M., Barrett, L. G., Thrall, P. H., and Harms, K. E. 2015. Host promiscuity in  
532 symbiont associations can influence exotic legume establishment and colonization of  
533 novel ranges. *Divers Distrib*. 21:1193–1203
- 534 Kusakabe, S., Higashitani, N., Kaneko, T., Yasuda, M., Miwa, H., Okazaki, S., Saeki, K.,  
535 Higashitani, A., and Sato, S. 2020. Lotus Accessions Possess Multiple Checkpoints  
536 Triggered by Different Type III Secretion System Effectors of the Wide-Host-Range  
537 Symbiont *Bradyrhizobium elkanii* USDA61. *Microbes Environment*. 35:ME19141
- 538 Lajudie, P. de, Laurent-Fulele, E., Willems, A., Torek, U., Coopman, R., Collins, M. D.,  
539 Kersters, K., Dreyfus, B., and Gillis, M. 1998a. *Allorhizobium undicola* gen. nov., sp.  
540 nov., nitrogen-fixing bacteria that efficiently nodulate *Neptunia natans* in Senegal. *Int J*  
541 *Syst Evol Micr*. 48:1277–1290
- 542 Lajudie, P. de, Willems, A., Nick, G., Moreira, F., Molouba, F., Hoste, B., Torck, U.,  
543 Neyra, M., Collins, M. D., Lindström, K., Dreyfus, B., and Gillis, M. 1998b.  
544 Characterization of tropical tree rhizobia and description of *Mesorhizobium plurifarum*  
545 sp. nov. *Int J Syst Evol Micr*. 48:369–382
- 546 Lajudie, P. de, Willems, A., Pot, B., Dewettimck, D., Maestrojuan, G., Neyra, M., Collins,  
547 M. D., Dreyfus, B., Kersters, K., and Gillis, M. 1994. Polyphasic Taxonomy of

- 548 Rhizobia: Emendation of the Genus *Sinorhizobium* and Description of *Sinorhizobium*  
549 *meliloti* comb. nov., *Sinorhizobium saheli* sp. nov., and *Sinorhizobium teranga* sp. nov.  
550 *Int J Syst Evol Micr.* 44:715–733
- 551 Liang, J., Hoffrichter, A., Brachmann, A., and Marín, M. 2018. Complete genome of  
552 *Rhizobium leguminosarum* Norway, an ineffective *Lotus* micro-symbiont. *Stand*  
553 *Genomic Sci.* 13:36
- 554 Liang, J., Klingl, A., Lin, Y.-Y., Boul, E., Thomas-Oates, J., and Marín, M. 2019. A  
555 subcompatible rhizobium strain reveals infection duality in *Lotus*. *Journal of*  
556 *experimental botany.* 70:1903–1913
- 557 Liu, C.-W., and Murray, J. D. 2016. The Role of Flavonoids in Nodulation Host-Range  
558 Specificity: An Update. *Plants.* 5:33
- 559 Madsen, E. B., Madsen, L. H., Radutoiu, S., Olbryt, M., Rakwalska, M., Szczyglowski, K.,  
560 Sato, S., Kaneko, T., Tabata, S., Sandal, N., and Stougaard, J. 2003. A receptor kinase  
561 gene of the LysM type is involved in legume perception of rhizobial signals. *Nature.*  
562 425:637–640
- 563 Madsen, L. H., Tirichine, L., Jurkiewicz, A., Sullivan, J. T., Heckmann, A. B., Bek, A. S.,  
564 Ronson, C. W., James, E. K., and Stougaard, J. 2010. The molecular network governing  
565 nodule organogenesis and infection in the model legume *Lotus japonicus*. *Nature*  
566 *communications.* 1:10–12
- 567 Małolepszy, A., Mun, T., Sandal, N., Gupta, V., Dubin, M., Urbański, D., Shah, N.,  
568 Bachmann, A., Fukai, E., Hirakawa, H., Tabata, S., Nadzieja, M., Markmann, K., Su, J.,  
569 Umehara, Y., Soyano, T., Miyahara, A., Sato, S., Hayashi, M., Stougaard, J., and  
570 Andersen, S. U. 2016. The LORE1 insertion mutant resource. *Plant J.* 88:306–317
- 571 Moeskjær, S., Skovbjerg, C. K., Tausen, M., Wind, R., Roulund, N., Janss, L., and  
572 Andersen, S. U. 2021. Major effect loci for plant size before onset of nitrogen fixation  
573 allow accurate prediction of yield in white clover. *Biorxiv.* :2021.04.16.440135
- 574 Montiel, J., Downie, J. A., Farkas, A., Bihari, P., Herczeg, R., Bálint, B., Mergaert, P.,  
575 Kereszt, A., and Kondorosi, É. 2017. Morphotype of bacteroids in different legumes  
576 correlates with the number and type of symbiotic NCR peptides. *Proc National Acad*  
577 *Sci.* 114:5041–5046
- 578 Montiel, J., Reid, D., Grønbæk, T. H., Benfeldt, C. M., James, E. K., Ott, T., Ditengou, F.  
579 A., Nadzieja, M., Kelly, S., and Stougaard, J. 2020. Distinct signaling routes mediate  
580 intercellular and intracellular rhizobial infection in *Lotus japonicus*. *Plant Physiol.*  
581 185:kiaa049-
- 582 Mora, Y., Díaz, R., Vargas-Lagunas, C., Peralta, H., Guerrero, G., Aguilar, A.,  
583 Encarnación, S., Girard, L., and Mora, J. 2014. Nitrogen-Fixing Rhizobial Strains



- 584 Isolated from Common Bean Seeds: Phylogeny, Physiology, and Genome Analysis.  
585 *Appl Environ Microb.* 80:5644–5654
- 586 Mun, T., Bachmann, A., Gupta, V., Stougaard, J., and Andersen, S. U. 2016. Lotus Base:  
587 An integrated information portal for the model legume *Lotus japonicus*. *Scientific*  
588 *reports.* 6:39447
- 589 Murakami, E., Cheng, J., Gysel, K., Bozsoki, Z., Kawaharada, Y., Hjuler, C. T., Sørensen,  
590 K. K., Tao, K., Kelly, S., Venice, F., Genre, A., Thygesen, M. B., Jong, N. de, Vinther,  
591 M., Jensen, D. B., Jensen, K. J., Blaise, M., Madsen, L. H., Andersen, K. R., Stougaard,  
592 J., and Radutoiu, S. 2018. Epidermal LysM receptor ensures robust symbiotic signalling  
593 in *Lotus japonicus*. *Elife.* 7:e33506
- 594 Oldroyd, G. E. D. 2013. Speak, friend, and enter: signalling systems that promote  
595 beneficial symbiotic associations in plants. *Nature reviews. Microbiology.* 11:252–263
- 596 Parker, M. A. 2001. Mutualism as a constraint on invasion success for legumes and  
597 rhizobia. *Divers Distrib.* 7:125–136
- 598 Perret, X., Staehelin, C., and Broughton, W. J. 2000. Molecular Basis of Symbiotic  
599 Promiscuity. *Microbiol Mol Biol R.* 64:180–201
- 600 Pueppke, S. G., and Broughton, W. J. 1999. *Rhizobium* sp. Strain NGR234 and *R. fredii*  
601 USDA257 Share Exceptionally Broad, Nested Host Ranges. *Mol Plant-microbe*  
602 *Interactions.* 12:293–318
- 603 Radutoiu, S., Madsen, L. H., Madsen, E. B., Felle, H. H., Umehara, Y., Grønlund, M., Sato,  
604 S., Nakamura, Y., Tabata, S., Sandal, N., and Stougaard, J. 2003. Plant recognition of  
605 symbiotic bacteria requires two LysM receptor-like kinases. *Nature.* 425:585–592
- 606 Radutoiu, S., Madsen, L. H., Madsen, E. B., Jurkiewicz, A., Fukai, E., Quistgaard, E. M.,  
607 Albrektsen, A. S., James, E. K., Thirup, S., and Stougaard, J. 2007. LysM domains  
608 mediate lipochitin–oligosaccharide recognition and Nfr genes extend the symbiotic host  
609 range. *Embo J.* 26:3923–3935
- 610 Ramírez-Bahena, M. H., Peix, A., Rivas, R., Camacho, M., Rodríguez-Navarro, D. N.,  
611 Mateos, P. F., Martínez-Molina, E., Willems, A., and Velázquez, E. 2009.  
612 *Bradyrhizobium pachyrhizi* sp. nov. and *Bradyrhizobium jicamae* sp. nov., isolated from  
613 effective nodules of *Pachyrhizus erosus*. *Int J Syst Evol Micr.* 59:1929–1934
- 614 Ratu, S. T. N., Teulet, A., Miwa, H., Masuda, S., Nguyen, H. P., Yasuda, M., Sato, S.,  
615 Kaneko, T., Hayashi, M., Giraud, E., and Okazaki, S. 2021. Rhizobia use a pathogenic-  
616 like effector to hijack leguminous nodulation signalling. *Sci Rep-uk.* 11:2034
- 617 Renier, A., Maillet, F., Fardoux, J., Poinot, V., Giraud, E., Nouwen, N. 2011.  
618 Photosynthetic *Bradyrhizobium* Sp. strain ORS285 synthesizes 2-O-methylfucosylated

- 619 lipochitooligosaccharides for nod gene-dependent interaction with *Aeschynomene*  
620 plants. *Mol Plant Microbe Interact.* 24:1440-7
- 621 Richardson, D. M., Allsopp, N., D'Antonio, C. M., Milton, S. J., and Rejmánek, M. 2000.  
622 Plant invasions — the role of mutualisms. *Biol Rev.* 75:65–93
- 623 Sandal, N., Jin, H., Rodríguez-Navarro, D.-N., Temprano, F., Cvitanich, C., Brachmann,  
624 A., Sato, S., Kawaguchi, M., Tabata, S., Parniske, M., Ruiz-Sainz, J. E., Andersen, S.  
625 U., and Stougaard, J. 2012. A set of *Lotus japonicus* Gifu x *Lotus burtii* recombinant  
626 inbred lines facilitates map-based cloning and QTL mapping. *DNA research : an*  
627 *international journal for rapid publication of reports on genes and genomes.* 19:317–323
- 628 Shah, N., Hirakawa, H., Kusakabe, S., Sandal, N., Stougaard, J., Schierup, M. H., Sato, S.,  
629 and Andersen, S. U. 2016. High-resolution genetic maps of *Lotus japonicus* and *L.*  
630 *burtii* based on re-sequencing of recombinant inbred lines. *DNA research : an*  
631 *international journal for rapid publication of reports on genes and genomes.* 23:487–494
- 632 Simsek, S., Ojanen-Reuhs, T., Stephens, S. B., and Reuhs, B. L. 2007. Strain-Ecotype  
633 Specificity in *Sinorhizobium meliloti*-*Medicago truncatula* Symbiosis Is Correlated to  
634 Succinoglycan Oligosaccharide Structure  $\nabla$ . *J Bacteriol.* 189:7733–7740
- 635 Smit, P., Limpens, E., Geurts, R., Fedorova, E., Dolgikh, E., Gough, C., and Bisseling, T.  
636 2007. *Medicago* LYK3, an Entry Receptor in Rhizobial Nodulation Factor Signaling.  
637 *Plant Physiol.* 145:183–191
- 638 Sprent, J. I. 2007. Evolving ideas of legume evolution and diversity: a taxonomic  
639 perspective on the occurrence of nodulation. *New Phytol.* 174:11–25
- 640 Sprent, J. I., Ardley, J., and James, E. K. 2017. Biogeography of nodulated legumes and  
641 their nitrogen-fixing symbionts. *New Phytol.* 215:40–56
- 642 Sugawara, M., Takahashi, S., Umehara, Y., Iwano, H., Tsurumaru, H., Odake, H., Suzuki,  
643 Y., Kondo, H., Konno, Y., Yamakawa, T., Sato, S., Mitsui, H., and Minamisawa, K.  
644 2018. Variation in bradyrhizobial NopP effector determines symbiotic incompatibility  
645 with Rj2-soybeans via effector-triggered immunity. *Nat Commun.* 9:3139
- 646 Terpolilli, J. J., O'Hara, G. W., Tiwari, R. P., Dilworth, M. J., and Howieson, J. G. 2008.  
647 The model legume *Medicago truncatula* A17 is poorly matched for N<sub>2</sub> fixation with the  
648 sequenced microsymbiont *Sinorhizobium meliloti* 1021. *New Phytol.* 179:62–66
- 649 Urbański, D. F., Małolepszy, A., Stougaard, J., and Andersen, S. U. 2012. Genome-wide  
650 LORE1 retrotransposon mutagenesis and high-throughput insertion detection in *Lotus*  
651 *japonicus*. *The Plant journal : for cell and molecular biology.* 69:731–741
- 652 Walker, L., Lagunas, B., and Gifford, M. L. 2020. Determinants of Host Range Specificity  
653 in Legume-Rhizobia Symbiosis. *Front Microbiol.* 11:585749

- 654 Wang, D., Yang, S., Tang, F., and Zhu, H. 2012. Symbiosis specificity in the legume –  
655 rhizobial mutualism. *Cell Microbiol.* 14:334–342
- 656 Wang, Q., Yang, S., Liu, J., Terecskei, K., Ábrahám, E., Gombár, A., Domonkos, Á.,  
657 Szűcs, A., Körmöczi, P., Wang, T., Fodor, L., Mao, L., Fei, Z., Kondorosi, É., Kaló, P.,  
658 Kereszt, A., and Zhu, H. 2017. Host-secreted antimicrobial peptide enforces symbiotic  
659 selectivity in *Medicago truncatula*. *Proc National Acad Sci.* 114:6854–6859
- 660 Yang, S., Tang, F., Gao, M., Krishnan, H. B., and Zhu, H. 2010. R gene-controlled host  
661 specificity in the legume–rhizobia symbiosis. *Proc National Acad Sci.* 107:18735–  
662 18740
- 663 Yang, S., Wang, Q., Fedorova, E., Liu, J., Qin, Q., Zheng, Q., Price, P. A., Pan, H., Wang,  
664 D., Griffitts, J. S., Bisseling, T., and Zhu, H. 2017. Microsymbiont discrimination  
665 mediated by a host-secreted peptide in *Medicago truncatula*. *Proc National Acad Sci.*  
666 114:6848–6853

667

668

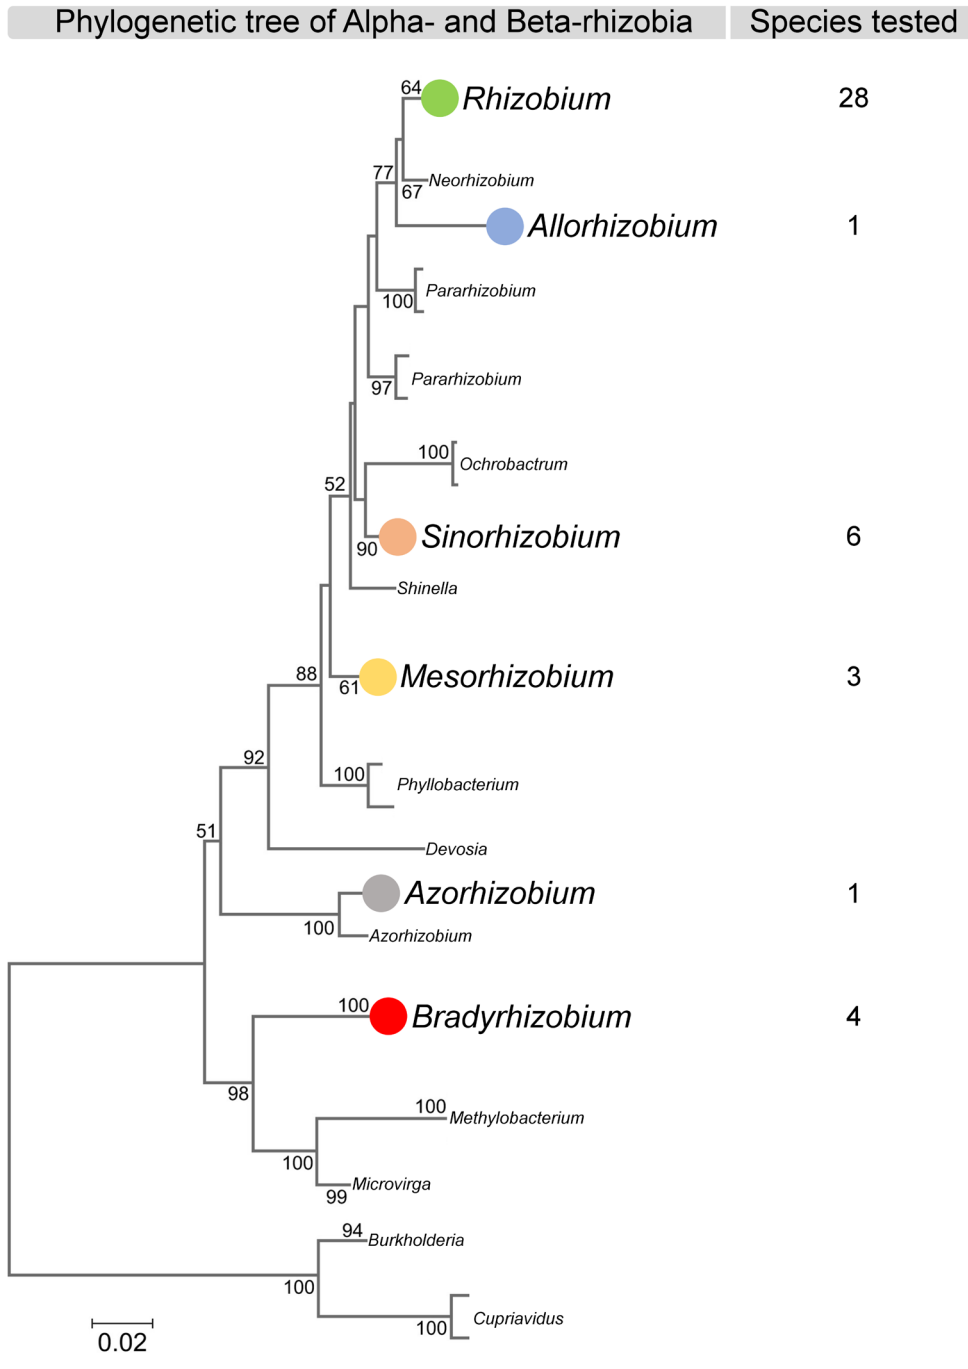

670 **Figure 1. Phylogenetic distribution of rhizobia used in this study.** Phylogenetic tree of  
671 Alpha and Beta-rhizobia adapted from Sprent et al. (2017) to highlight the number of species  
672 used in this work from each rhizobial genus to evaluate the nodulation capacity of *L.*  
673 *japonicus* Gifu and *Lotus burtii*.  
674

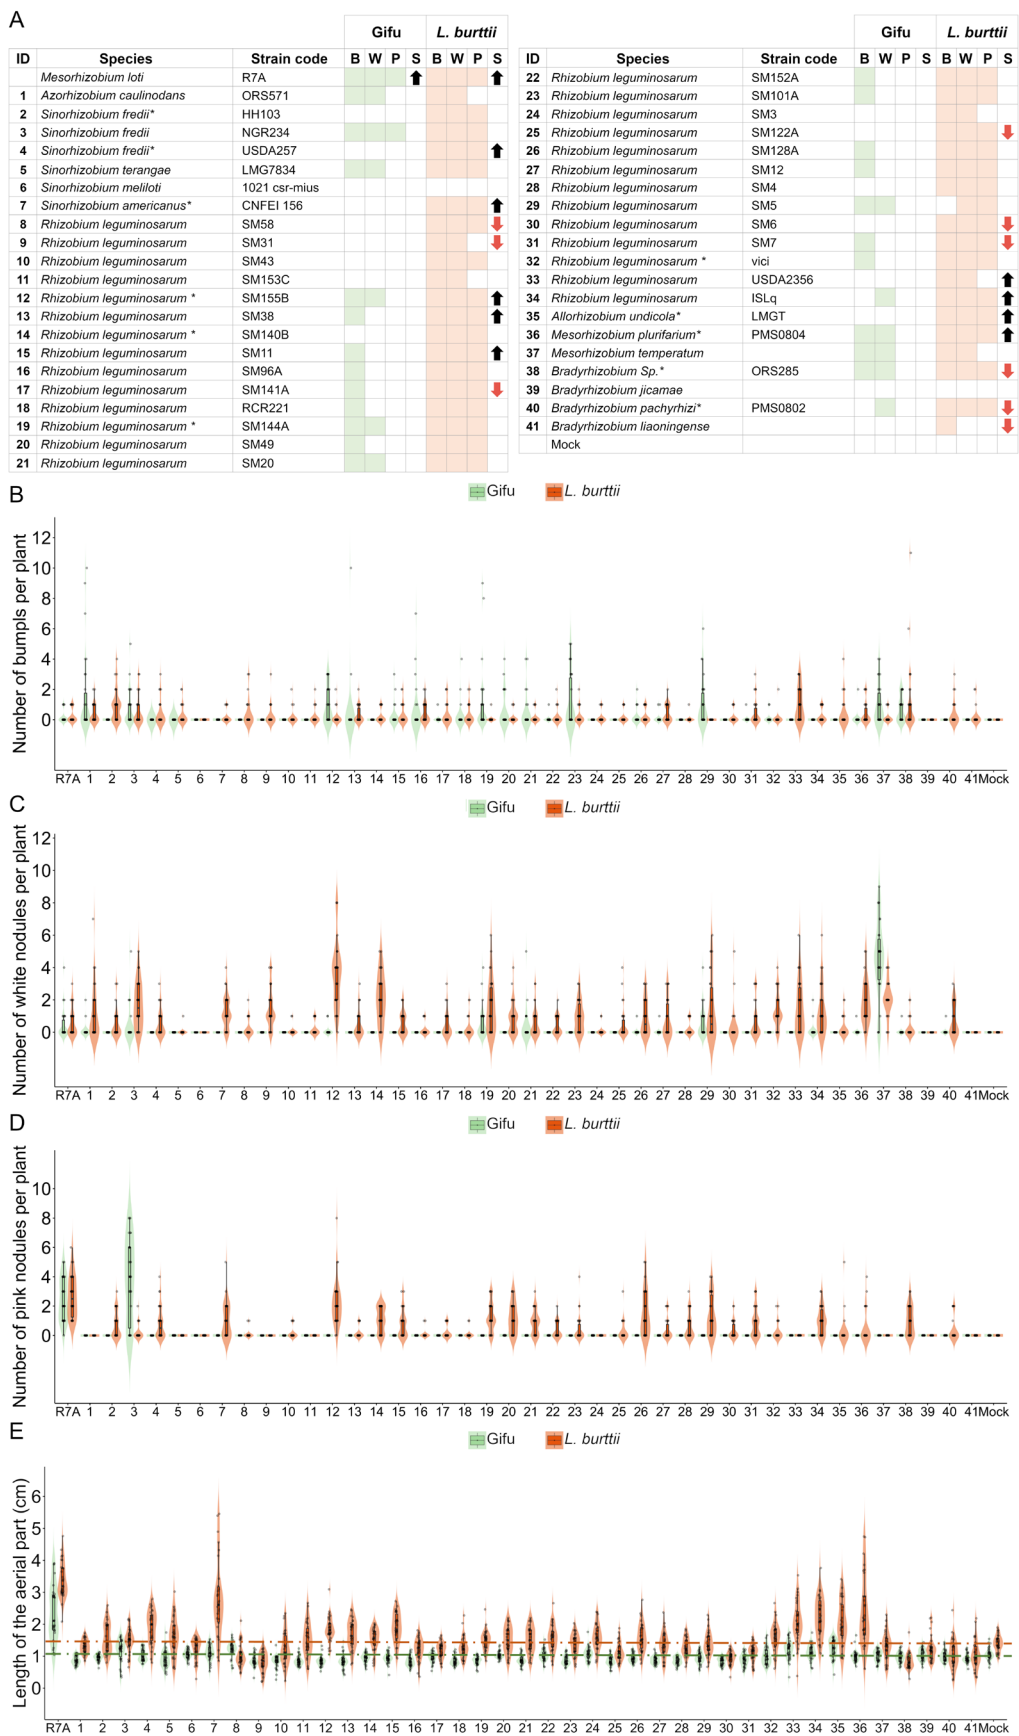

676 **Figure 2. Nodulation and shoot phenotypes.** **A**, Presence (filled rectangles) or absence  
677 (unfilled rectangles) of bumps (B), white nodules (W), and pink nodules (P) in Gifu and *L.*  
678 *burttii* plants at 5 wpi with 42 different rhizobial strains. In column S, the black and red  
679 arrows indicate a significant increase or decrease of the shoot length respect to mock-treated  
680 plants, respectively. Student's t test;  $P < 0.01$ . **B-E**, Violin dot plots showing the number of  
681 bumps, white nodules, pink nodules and shoot length in Gifu and *L. burttii* harvested at 5 wpi  
682 with the rhizobial indicated in 2A. Dashed lines in green and orange highlight the average  
683 shoot length in mock-treated plants of Gifu and *L. burttii*, respectively.

684



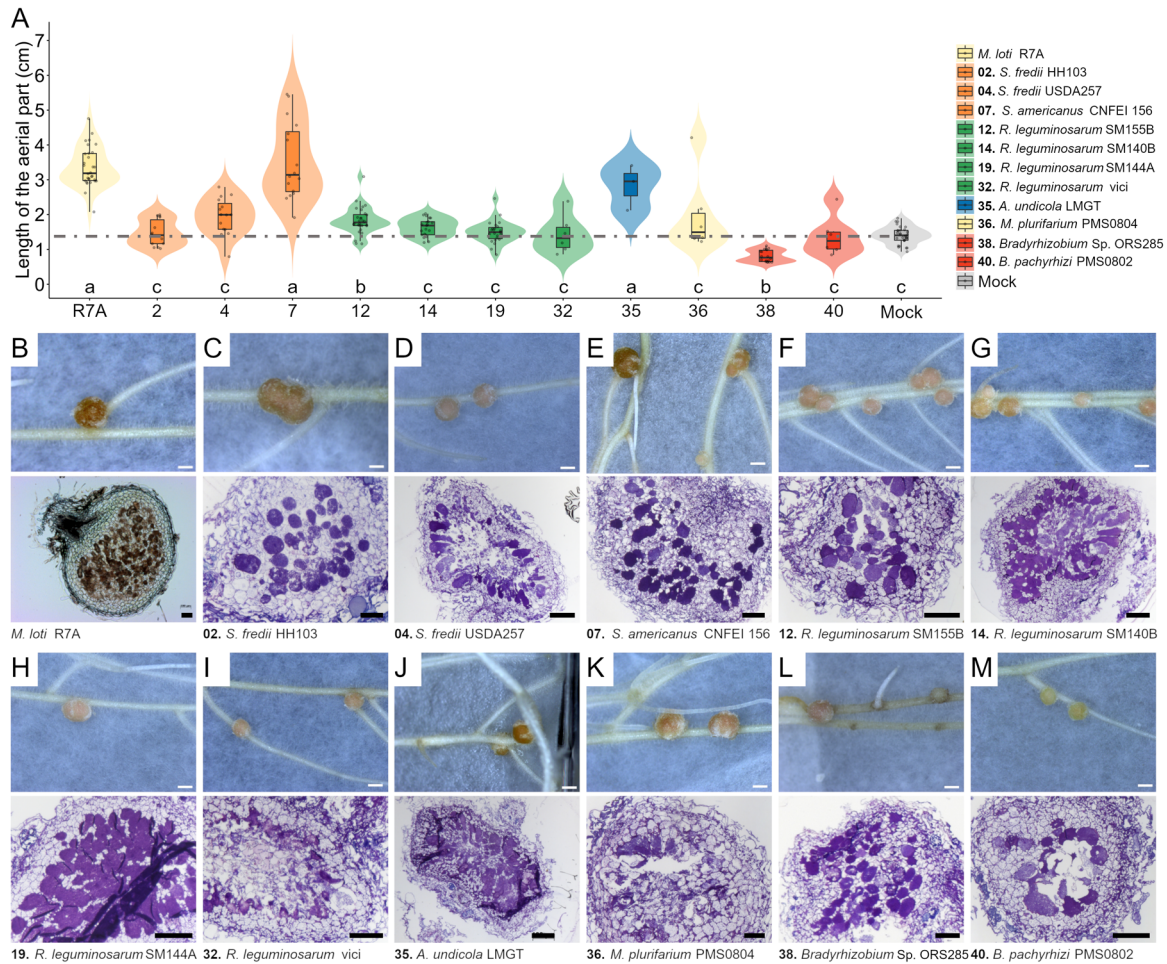

685

686 **Figure 3. Shoot length and nodule histology of *L. burttii* plants.** A, Violin dot plots  
 687 showing the shoot length of *L. burttii* plants with pink nodules at 5 wpi with rhizobial species  
 688 from different genera. Letters a and c, below the violin plots, indicate non-significant  
 689 differences between the shoot length compared to mock-treated or R7A-inoculated plants,  
 690 respectively; b, means significant difference to mock-treated and R7A-inoculated plants.  
 691 ANOVA, P-Tukey < 0.01. The colour code reflects the phylogenetic proximity of the species  
 692 shown in Figure 1. Dashed grey line highlights the average shoot length in mock-treated  
 693 plants. **B-M**, Nodule histology with representative images of pink nodules developed in *L.*  
 694 *burttii* by different rhizobial strains. Scale bar, 1 mm for nodules and 100 µm nodule sections.

695

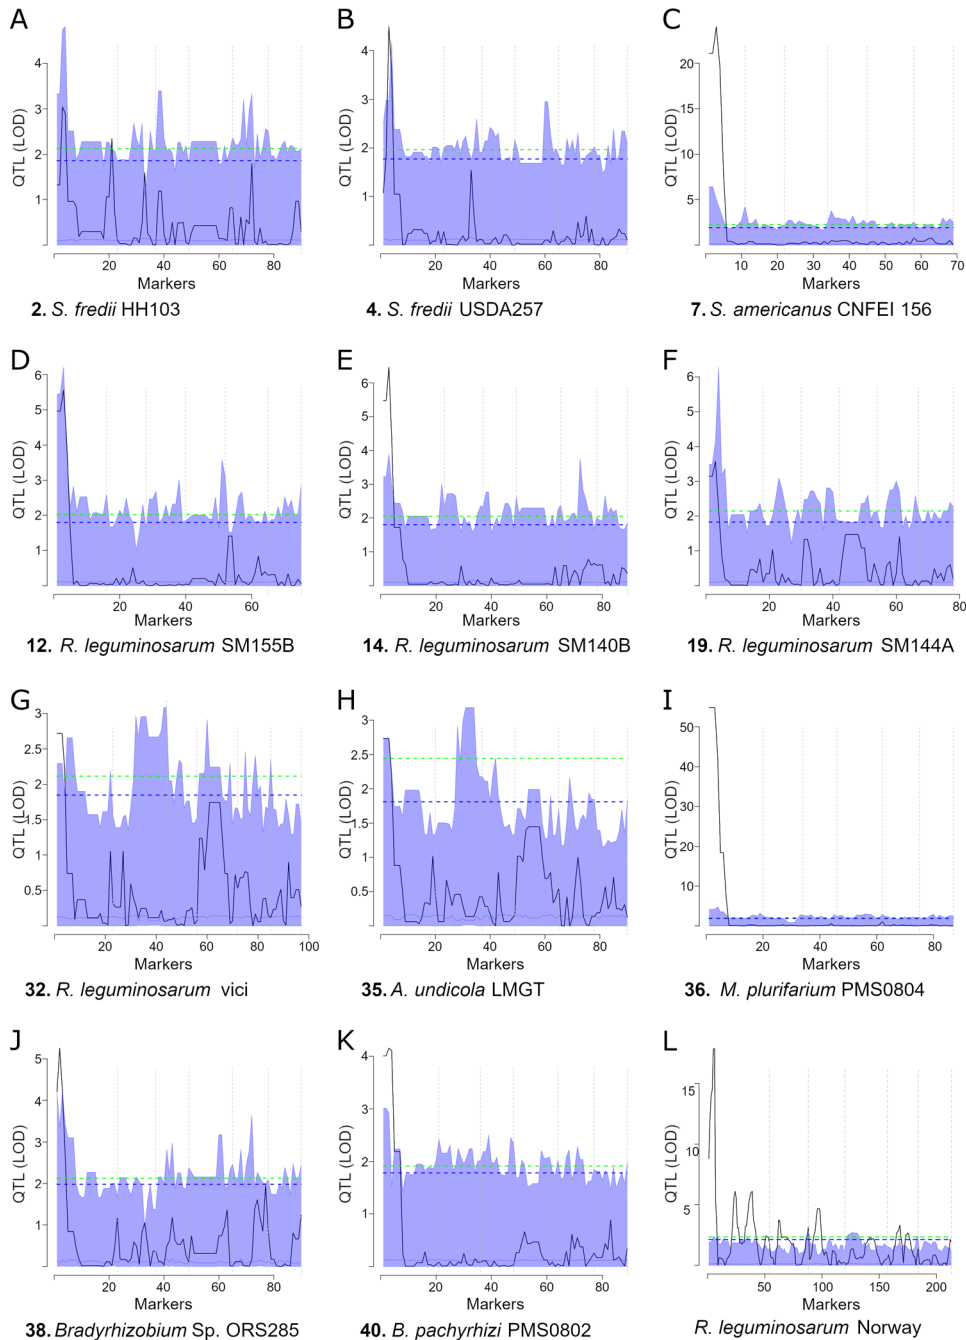

696

697 **Figure 4. QTL analysis of Gifu x *L. burttii* RIL nodulation.** The trait analysed is the  
 698 average number of pink nodules. A: *S. fredii* HH103. B: *S. fredii* USDA257. C: *S. americanus*  
 699 CFEI156. D: *R. leguminosarum* SM155B. E: *R. leguminosarum* SM140B. F: *R.*  
 700 *leguminosarum* SM144A. G: *R. leguminosarum* vici. H: *A. undicola* LMGT. I: *M.*  
 701 *plurifarium* PMS0804. J: *Bradyrhizobium* sp. ORS285. K: *B. pachyrhizi* PMS0802. L: *R.*  
 702 *leguminosarum* Norway.

703



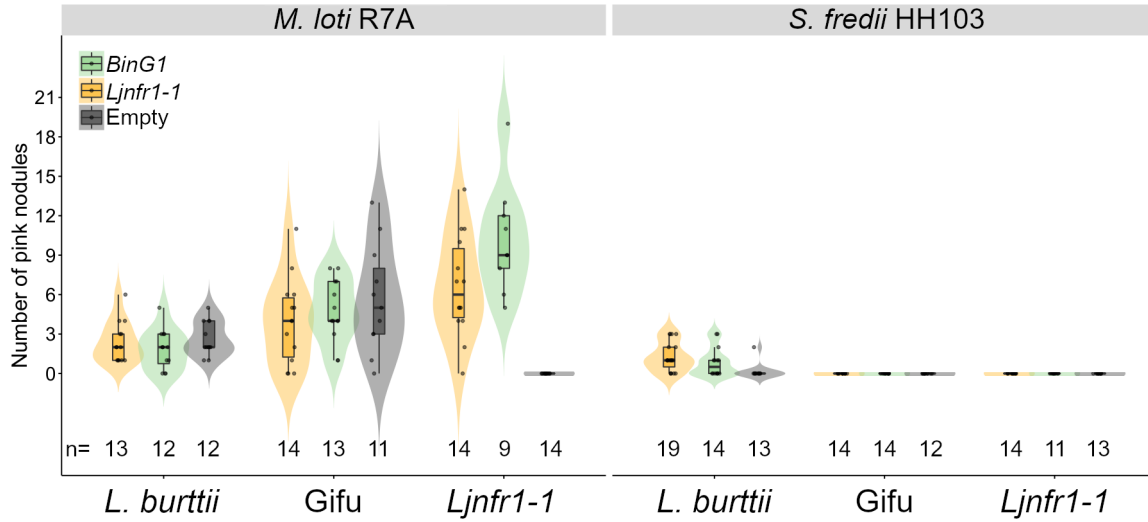

704

705 **Figure 5. Influence of the *Nfr1* genotype on nodulation with *S. fredii* HH103.** Violin dot  
706 plots show the number of pink nodules found in *L. burttii*, Gifu and the *Ljnfr1-1* mutant  
707 transformed with the *BinG1* and *LjNfr1* constructs or the empty vector at 5 wpi with *M. loti*  
708 R7A and *S. fredii* HH103. *BinG1*, *Nfr1* extracellular domain of Gifu replaced by the  
709 corresponding fragment from *L. burttii* *Nfr1* expressed under *LjNfr1* promoter. *LjNfr1*, Gifu  
710 *Nfr1* sequence expressed under its native promoter. The number of plants tested is indicated  
711 below the violin plots.

712

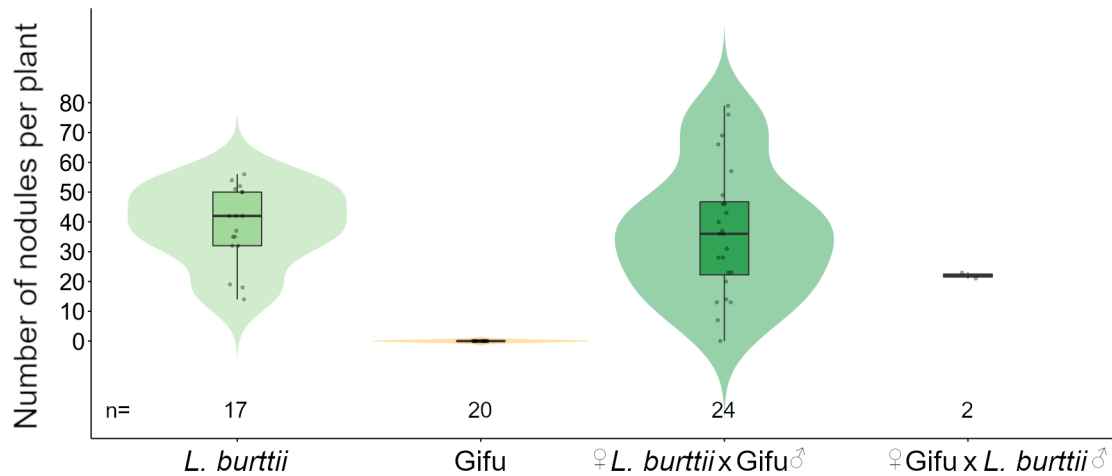

713

714 **Figure 6. *L. burttii* x *L. japonicus* Gifu F1 genotype and nodulation phenotype with *R.***  
715 ***leguminosarum* Norway.** A, Violin dot plots show the nodule numbers at 6 wpi with *R.*  
716 ***leguminosarum* Norway in *L. burttii*, *L. japonicus* Gifu and the F1 progeny from crosses**  
717 **between these two genotypes. The number of plants tested are described below the violin dot**  
718 **plots. B, Agarose gel with PCR products amplified with a set of primers for the *Lotus* power**  
719 **marker TM1203 using as template DNA isolated from *L. burttii* (Lb), *L. japonicus* Gifu (Lj**  
720 **Gifu) and the F1 progeny from their crosses (Lb x Lj Gifu).**

721

722

| Rhizobial strain                                  | Nod factor substitutions |                  |                         |
|---------------------------------------------------|--------------------------|------------------|-------------------------|
|                                                   | Acyl group               | Non-reducing end | Reducing end            |
| <b><i>Azorhizobium</i> Sp.</b>                    |                          |                  |                         |
| * <i>A. caulinodans</i> ORS571                    | C18:1,C18:0              | Me, Cb, H        | Fuc, Ara, Me, H         |
| <b><i>Sinorhizobium</i> Sp.</b>                   |                          |                  |                         |
| * <i>Sinorhizobium</i> NGR234                     | C18:1,C16:0              | Me, Cb, H        | 3-O-S-2-O-MeFuc , Me, H |
| * <i>S. fredii</i> HH103                          | C16:0,C16:1              | H                | 2-O-MeFuc, Fuc, Me, H   |
| * <i>S. fredii</i> USDA257                        | C18:1                    | H                | 2-O-MeFuc, Fuc, Me, H   |
| <i>S. teranga</i> <i>bv. acaciae</i> ORS1073      | C16:0,C18:0,C18:1        | Me, Cb, H        | S, H                    |
| <i>S. teranga</i> <i>bv. sesbaniae</i>            | C16:0,C18:1              | Me, Cb, H        | Fucy, Ara, Me, H        |
| * <i>S. meliloti</i> RCR2011                      | C16:1,C16:2,C16:3        | Ac, H            | Me, H                   |
| <b><i>Rhizobium</i> Sp.</b>                       |                          |                  |                         |
| <i>R. leguminosarum</i> <i>bv. viciae</i> A1      | C16:0,C16:1,C18:0        | Ac, H            | Ac, Me, H               |
| <i>R. leguminosarum</i> <i>bv. viciae</i> RBL5560 | C18:4,C18:1,C18:0        | Ac, H            | Me, H                   |
| <i>R. leguminosarum</i> <i>bv. viciae</i> TOM     | C18:4,C18:1              | Ac, H            | Ac, Me, H               |
| <b><i>Mesorhizobium</i> Sp.</b>                   |                          |                  |                         |
| * <i>M. loti</i> R7A                              | C16:0,C16:1,C18:0        | Me,Cb, Fuc, H    | Ac, Fuc, H              |
| <b><i>Bradyrhizobium</i> Sp.</b>                  |                          |                  |                         |
| <i>Bradyrhizobium</i> strains                     | C18:1,C18:2              | Me, Cb, H        | 3-O-S-2-O-MeFuc, H      |
| * <i>Bradyrhizobium</i> ORS285                    | C18:1                    | Me, Cb, H        | 2-O-MeFuc, H            |

723 **Table 1. NF structure in rhizobial strains from different genera.** Composition and  
724 chemical decorations in the nonreducing and reducing end of NF produced by rhizobial  
725 species used in this study (\*) and closely related strains. Table adapted from D’Haeze and  
726 Holsters (2002). Abbreviations: Ac, acetyl; Ara, arabinosyl; Cb, carbamoyl; Fuc, fucosyl;  
727 Me, methyl; S, sulfate ester; H, hydroxide. The colour code reflects the phylogenetic  
728 proximity of the species shown in Figure 1.

729

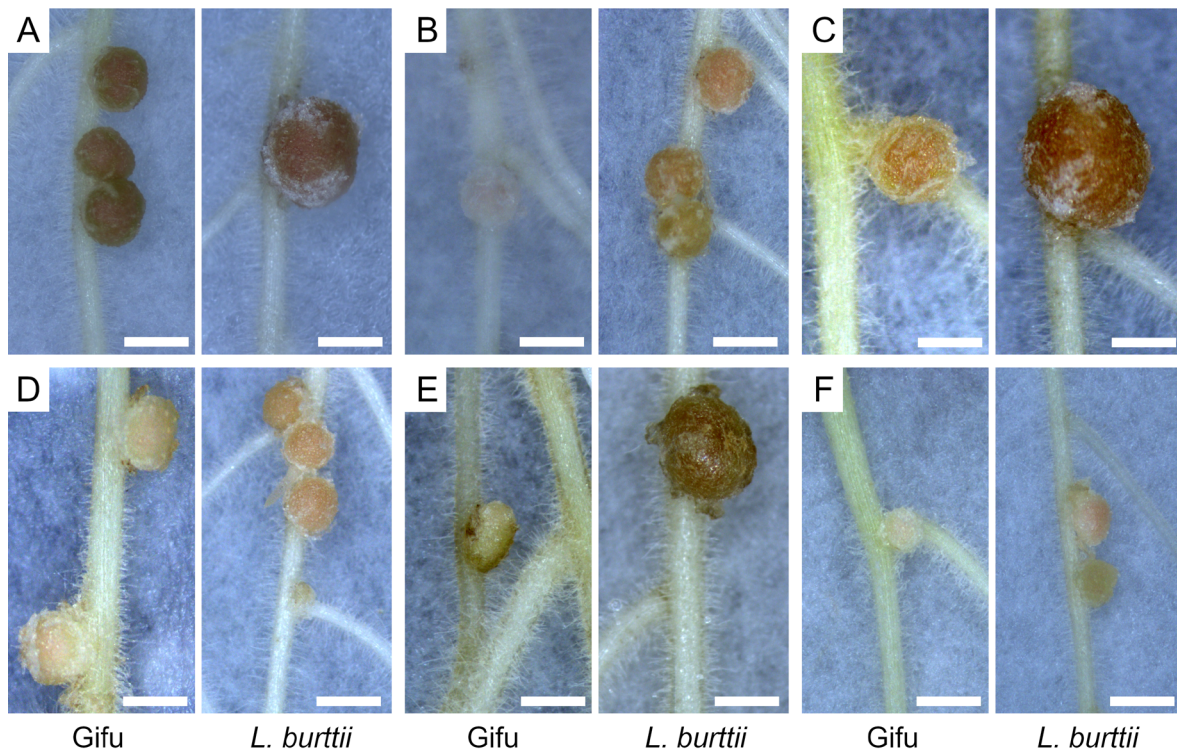

731 **Supplementary Figure S1. Contrasting nodulation phenotypes in Gifu and *L. burttii***  
732 **with different rhizobial species.** Representative images of nodule structures developed in  
733 Gifu and *L. burttii* plants at 5 wpi with *S. fredii* NGR234 (A), *S. teranga* LMG7834 (B), *R.*  
734 *leguminosarum* SM20 (C), *R. leguminosarum* SM5 (D), *M. plurifarium* PMS0804 (E) and *B.*  
735 *pachyrhizi* PMS0802 (F). Scale bar, 1 mm.
